# Supplementary material for: Treatment with mRNA coding for the necroptosis mediator MLKL induces antitumor immunity directed against neo-epitopes
Source: PubMed Central journal article supplement (PMC6109072; doi:10.1038/s41467-018-05979-8), 2018-08-24
Supplement: 41467_2018_5979_MOESM3_ESM.pdf [file 41467_2018_5979_MOESM3_ESM.pdf]

## **Description of Additional Supplementary Files**

### **File Name: Supplementary Movie 1**

**Description:** Time lapse of B16 cells transfected with mRNA encoding MLKL.

### **File Name: Supplementary Movie 2**

**Description:** Time lapse of B16 cells transfected with mRNA encoding tBid.
